# Supplementary material for: Growing and Etching MoS2 on Carbon Nanotube Film for Enhanced Electrochemical Performance
Source: MDPI journal article supplement (doi:10.3390/molecules21101318), 2016-09-30
Supplement: s1 [file s1]

## Supplementary Materials: Growing and Etching MoS<sub>2</sub> on Carbon Nanotube Film for Enhanced Electrochemical Performance

Weiyu Xu, Qi Fang, Daobin Liu, Ke Zhang, Muhammad Habib, Chuanqiang Wu, Xusheng Zheng, Hengjie Liu, Shuangming Chen and Li Song

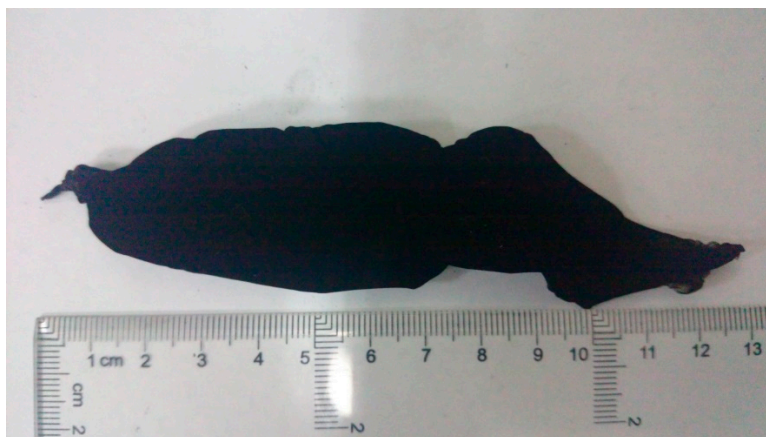

**Figure S1.** Optical image of as-grown CNT film. Size: 12 cm × 4 cm.

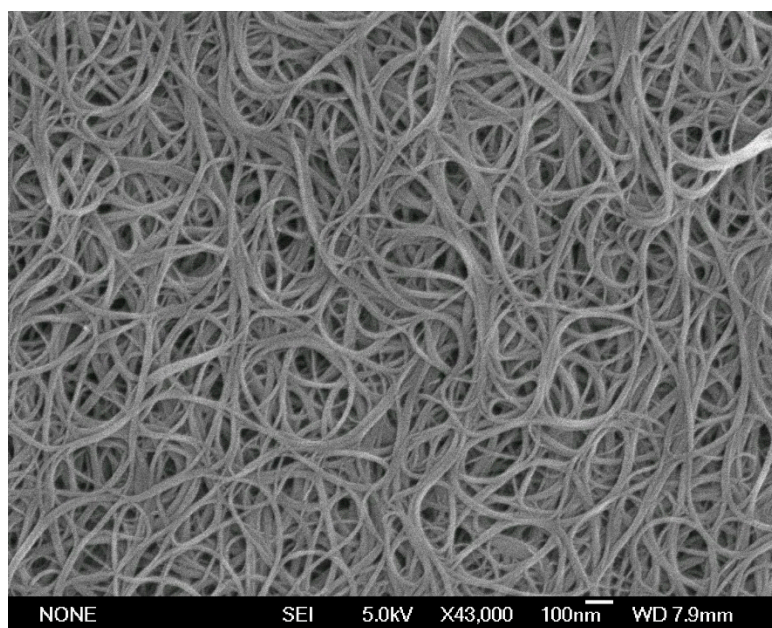

**Figure S2.** SEM characterization of purified CNT film.

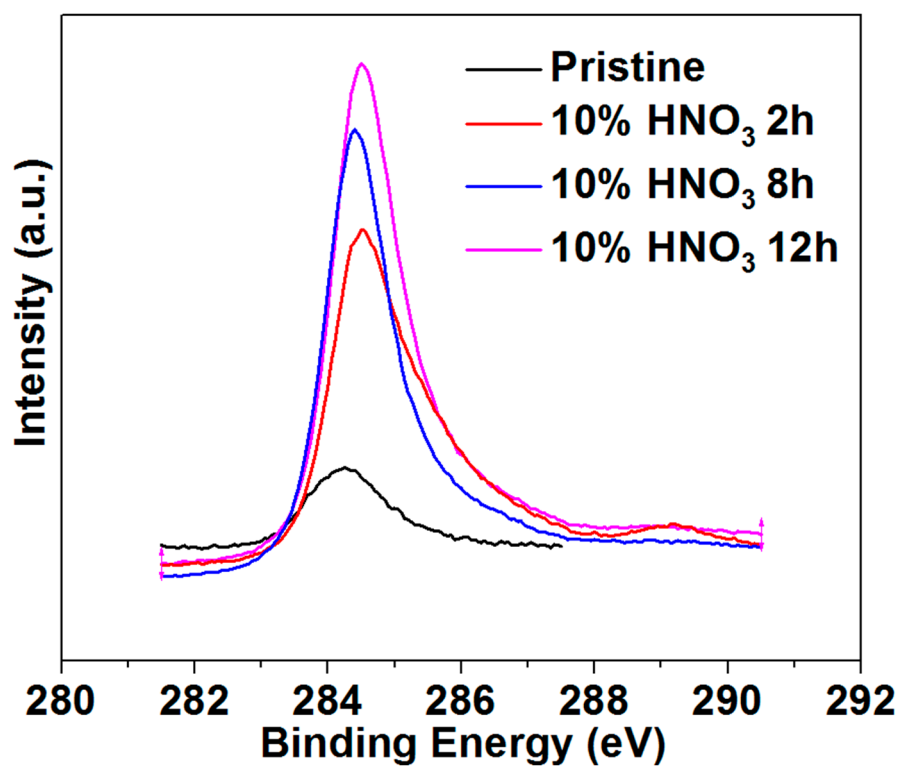

**Figure S3.** C (1s) XPS scan results of different HNO<sub>3</sub> etching duration samples.
